# Supplementary material
Source: PubMed Central journal article supplement (PMC3190830)
Supplement: supp_M111.291591_jbc.M111.291591-2.pdf [file supp_M111.291591_jbc.M111.291591-2.pdf]

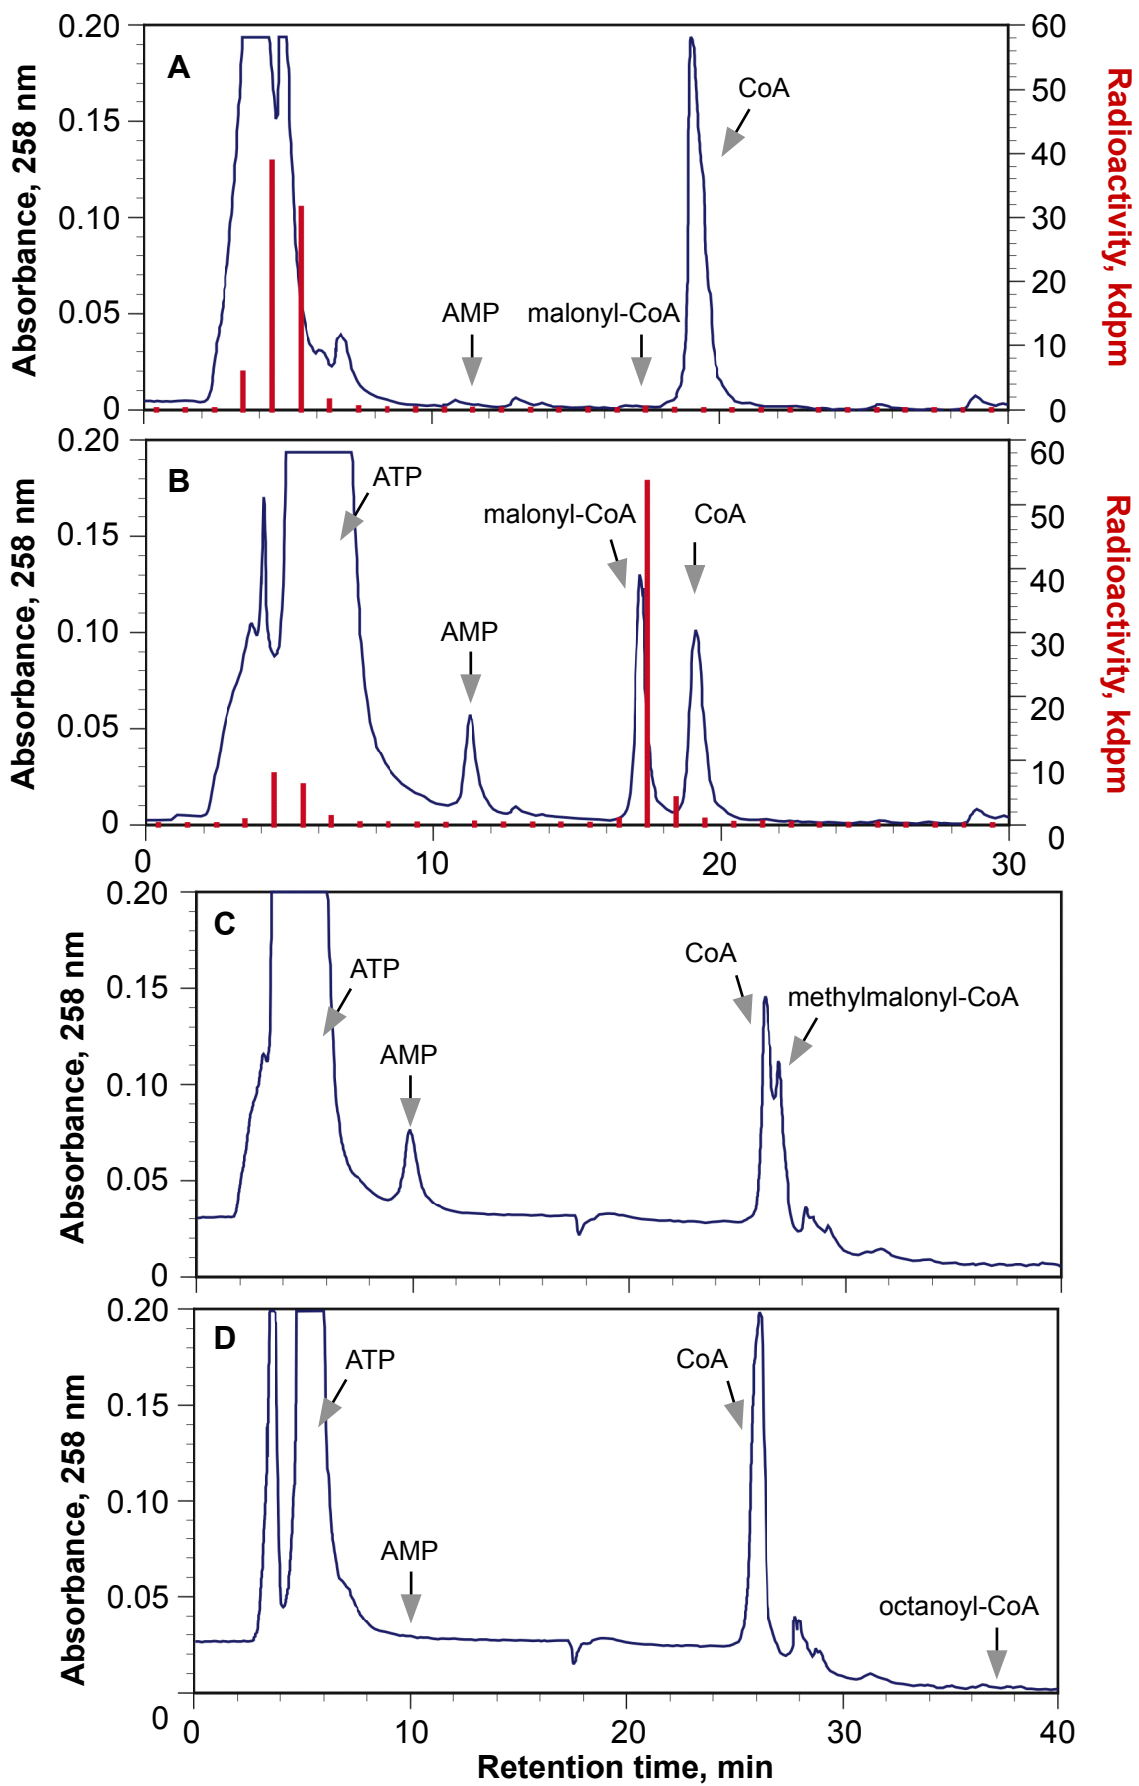

**FIG. 2. Typical hplc analyses of ACSF3 reaction products obtained with different substrates.**

Reactions were performed and products analyzed as described in Experimental Procedures using gradient system #1 for panels A and B and gradient system #2 for panels C and D. Products (CoA esters and AMP) were detected by radioactivity and/or absorbance at 258 nm. The elution positions of authentic compounds are marked by arrows. A: Substrate was [2-<sup>14</sup>C] malonate, ATP was omitted from the assay. B: [2-<sup>14</sup>C] malonate, ATP present. C: methylmalonate, ATP present. D: octanoate, ATP present.
